# Supplementary material for: Urokinase Plasminogen Activator Receptor (uPAR) and Plasminogen Activator Inhibitor-1 (PAI-1) Are Potential Predictive Biomarkers in Early Stage Oral Squamous Cell Carcinomas (OSCC)
Source: PubMed Central journal article supplement (PMC4084992; doi:10.1371/journal.pone.0101895), 2014-07-07
Supplement: pone.0101895.s004.pdf [file pone.0101895.s004.pdf]

**Table S1.** Disease specific death (DSD) for all cases (N=115) in relation to clinicopathological variables.

|                               | <b>Patients<br/>N (% of total)</b> | <b>5-year DSD<br/>N (% of total)</b> | <b>DSD p</b>      |
|-------------------------------|------------------------------------|--------------------------------------|-------------------|
| <b>Gender</b>                 |                                    |                                      |                   |
| Male                          | 64 (56%)                           | 27 (42%)                             | 0.557             |
| Female                        | 51 (44%)                           | 19 (37%)                             |                   |
| <b>Tumour differentiation</b> |                                    |                                      |                   |
| Well                          | 46 (40%)                           | 15 (33%)                             | 0.187             |
| Moderate                      | 58 (50%)                           | 25 (43%)                             |                   |
| Poor                          | 11 (10%)                           | 6 (55%)                              |                   |
| <b>Tumour size</b>            |                                    |                                      |                   |
| T1                            | 39 (34%)                           | 7 (18%)                              | <b>&lt;0.001*</b> |
| T2                            | 42 (37%)                           | 12 (29%)                             |                   |
| T3                            | 8 (7%)                             | 6 (75%)                              |                   |
| T4                            | 22 (19%)                           | 17 (77%)                             |                   |
| Unknown                       | 4 (3%)                             | 4 (100%)                             |                   |
| <b>Lymph node status</b>      |                                    |                                      |                   |
| N0                            | 72 (63%)                           | 20 (27%)                             | <b>&lt;0.001*</b> |
| N+                            | 31 (27%)                           | 20 (65%)                             |                   |
| Unknown                       | 12 (10%)                           | 6 (50%)                              |                   |

\*; p<0.05 was regarded as statistically significant
